# Supplementary material
Source: publisher site journal article supplement (https://www.dovepress.com/get_supplementary_file.php?f=508538.docx)
Supplement: Supplementary file 1 [file get_supplementary_file.php]

**Supplementary Material**

for

**Development and validation of a predictive nomogram for myelosuppression risk in chronic hepatitis B patients treated with peginterferon**

**Supplementary Table**

**Supplementary Table 1** Numbers of patients with decreases in different blood cell types, for different myelosuppression grades

|  | **Patient # for different myelosuppression grades** | | | | |
| --- | --- | --- | --- | --- | --- |
| **0** | **I** | **Ⅱ** | **Ⅲ** | **IV** |
| White blood cell (×109/L) | 55 (35.9) | 63 (41.2) | 34 (22.2) | 1 (0.7) | 0 (0) |
| Neutrophil (×109/L) | 34 (22.2) | 43 (28.1) | 56 (36.6) | 19 (12.4) | 1 (0.7) |
| Hemoglobin (g/L) | 149 (97.4) | 4 (2.6) | 0 (0) | 0 (0) | 0 (0) |
| Platelet (×109/L) | 134 (87.6) | 17 (11.1) | 2 (1.3) | 0 (0) | 0 (0) |
